# Supplementary material
Source: PubMed Central journal article supplement (PMC528768)

# A

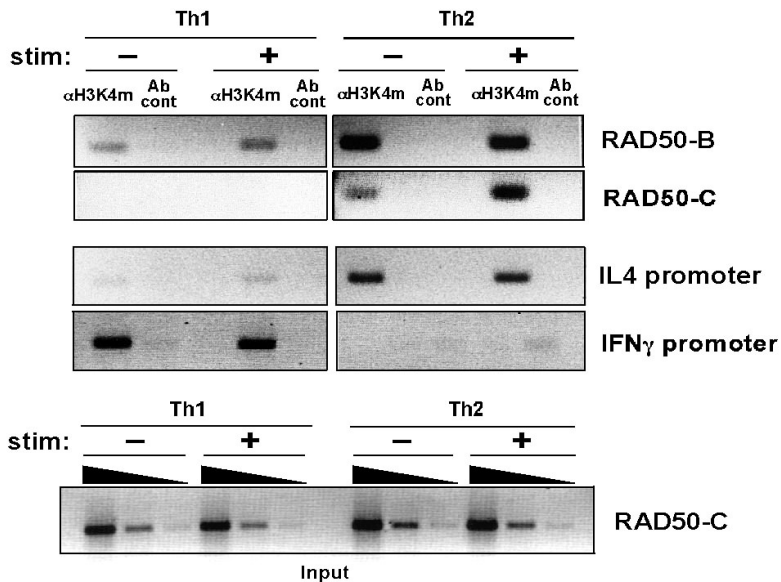

# B

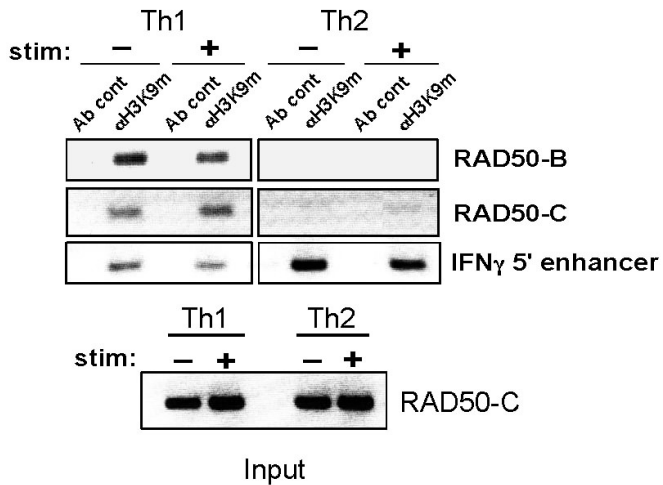

Supplement: pnas_101_45_16010__1.pdf [file pnas_101_45_16010__1.pdf]
